# Supplementary material for: Absence of SPARC results in increased cardiac rupture and dysfunction after acute myocardial infarction
Source: PubMed Central journal article supplement — J Exp Med. 2009 Jan 19;206(1):113–23. doi: 10.1084/jem.20081244 (PMC2626676; doi:10.1084/jem.20081244), 2009-01-19
Supplement: jem.20081244_1.pdf [file jem.20081244_1.pdf]

**Table S1.** Transcript levels of ECM mRNAs after MI (in arbitrary units)

|                 | WT<br>n=6                | SPARC null<br>n=6        |
|-----------------|--------------------------|--------------------------|
| <b>Sham</b>     |                          |                          |
| Collagen I      | 0.12 ± 0.01              | 0.10 ± 0.01              |
| Collagen III    | 0.05 ± 0.01              | 0.07 ± 0.01              |
| Fibronectin     | 0.05 ± 0.01              | 0.08 ± 0.01              |
| <b>MI, 7 d</b>  |                          |                          |
| Collagen I      | 1.18 ± 0.23 <sup>a</sup> | 1.14 ± 0.08 <sup>a</sup> |
| Collagen III    | 0.91 ± 0.16 <sup>a</sup> | 0.97 ± 0.08 <sup>a</sup> |
| Fibronectin     | 0.81 ± 0.14 <sup>a</sup> | 0.87 ± 0.13 <sup>a</sup> |
| <b>MI, 14 d</b> |                          |                          |
| Collagen I      | 2.03 ± 0.36 <sup>a</sup> | 1.79 ± 0.23 <sup>a</sup> |
| Collagen III    | 1.50 ± 0.26 <sup>a</sup> | 1.49 ± 0.14 <sup>a</sup> |
| Fibronectin     | 1.58 ± 0.32 <sup>a</sup> | 1.81 ± 0.32 <sup>a</sup> |

<sup>a</sup>P < 0.05 in infarcted (MI) versus sham-operated mice.**Table S2.** Transcript levels of ECM mRNAs after MI in AdvR5- and AdvSPARC-treated mice (in arbitrary units)

|                 | AdvR5<br>n = 6           | AdvSPARC<br>n = 6          |
|-----------------|--------------------------|----------------------------|
| <b>Sham</b>     |                          |                            |
| Collagen I      | 0.10 ± 0.02              | 0.09 ± 0.03                |
| Collagen III    | 0.04 ± 0.01              | 0.05 ± 0.02                |
| Fibronectin     | 0.05 ± 0.02              | 0.06 ± 0.01                |
| <b>MI, 14 d</b> |                          |                            |
| Collagen I      | 1.72 ± 0.32 <sup>a</sup> | 2.3 ± 0.25 <sup>a</sup>    |
| Collagen III    | 0.67 ± 0.11 <sup>a</sup> | 1.02 ± 0.09 <sup>a,b</sup> |
| Fibronectin     | 0.59 ± 0.10 <sup>a</sup> | 1.13 ± 0.17 <sup>a,b</sup> |

<sup>a</sup>P < 0.05 in infarcted (MI) versus sham-operated mice.<sup>b</sup>P < 0.05 in AdvSPARC infarcts versus AdvR5 infarcts.**Table S3.** Primers used with real-time PCR

| Gene         | Forward primer, 5'–3'   | Reverse primer, 5'–3'    |
|--------------|-------------------------|--------------------------|
| Collagen I   | CTTCACCTACAGCACCTTGTG   | CTTGGTGGTTTGTATTCGATGAC  |
| Collagen III | TCGGAAGTGCAGAGACCTAAA   | CCCCAGTTTCCATGTTACAGA    |
| Fibronectin  | ATGTGGACCCCTCTGATAGT    | GCCCAGTGATTCAGCAAAGG     |
| Cyclophilin  | CAAATGCTGGACAAACACAA    | GCCATCCAGCCATTGAGTCT     |
| ARBP         | GGACCCGAGAAGACCTCCTT    | GCACATCACTCAGAATTTCAATGG |
| SMOC1        | AAAACGAGCAGGCACAAACC    | GCCTTTTGCTTTTCCACTCTTTAG |
| SMOC2        | CACTGCTGTGGCCACAA       | GCGGCACCTTTTCATTTAATG    |
| Hevin        | CACAAGGGAAACCTCACTGTGTT | AAGCCTGATCTAGGATTTTGTGCA |
| SPARC        | GAGGAGGTGGTGGCTGACAA    | CACCTTGCCATGTTTGCAAT     |

**Table S4.** Sequence for SPARC shRNA

| ShRNA SPARC     | Sequence                                              |
|-----------------|-------------------------------------------------------|
| Sense 5'–3'     | GGTGAAATGGGAGAGTTTTTCAAGAGAAAACCTCCCATTTCCACCTTTTC    |
| Antisense 5'–3' | TCGAGAAAAAGGTGAAATGGGAGAGTTTTCTTGAAAAACCTCCCATTTCCACC |
